# Supplementary material for: Acquisition phase-specific contribution of climbing fiber transmission to cerebellum-dependent motor memory in mice
Source: eLife. 2025 Sep 2;13:RP95838. doi: 10.7554/eLife.95838 (PMC12404610; doi:10.7554/eLife.95838)
Supplement: Figure 1—source data 1. [file elife-95838-fig1-data1.xlsx]

## Sheet: Figure 1F
CS spikelet
GFP			NpHR
OFF	ON		OFF	ON
2	2		4	0
4	3		1	0
3	3		2	0
1	1		2	0
0	0		3	0
2	2		3	0
3	3		3	0
2	2		0	0
