# Supplementary material for: Acquisition phase-specific contribution of climbing fiber transmission to cerebellum-dependent motor memory in mice
Source: eLife. 2025 Sep 2;13:RP95838. doi: 10.7554/eLife.95838 (PMC12404610; doi:10.7554/eLife.95838)
Supplement: Figure 1—source data 2. [file elife-95838-fig1-data2.xlsx]

## Sheet: Figure 1D
CF EPSC inhibition (%)
GFP	NpHR
-0.28085	99.6275
-4.36313	96.4646
0.191744	73.2728
1.96443	97.1541
-0.93352	95.6347
-4.70825	96.7258
4.43494	96.7336
3.46623	99.8055
-2.36334	99.177
0.587623
