# Supplementary material for: Acquisition phase-specific contribution of climbing fiber transmission to cerebellum-dependent motor memory in mice
Source: eLife. 2025 Sep 2;13:RP95838. doi: 10.7554/eLife.95838 (PMC12404610; doi:10.7554/eLife.95838)
Supplement: Figure 2—source data 1. [file elife-95838-fig2-data1.xlsx]

## Sheet: Figure 2-source data 1 (IO_GFP)
	OFF	OFF	OFF	ON	ON	ON
	1.4			1.3
	1.3			1.2
	1			1.5
	1.3			1.1
	1.5			1.50001
	1.2			1.4
	1.1			1
	1.1			1.3
