# Supplementary material for: Acquisition phase-specific contribution of climbing fiber transmission to cerebellum-dependent motor memory in mice
Source: eLife. 2025 Sep 2;13:RP95838. doi: 10.7554/eLife.95838 (PMC12404610; doi:10.7554/eLife.95838)
Supplement: Figure 2—source data 2. [file elife-95838-fig2-data2.xlsx]

## Sheet: Figure 2-source data 2 (IO_NpHR
	OFF	OFF	OFF	ON	ON	ON
	1			0
	1.5			0.2
	1.2			0.1
	1.5			0
	1.3			0
	1.3			0
