# Supplementary material for: Acquisition phase-specific contribution of climbing fiber transmission to cerebellum-dependent motor memory in mice
Source: eLife. 2025 Sep 2;13:RP95838. doi: 10.7554/eLife.95838 (PMC12404610; doi:10.7554/eLife.95838)
Supplement: Figure 2—source data 3. [file elife-95838-fig2-data3.xlsx]

## Sheet: Figure 2-source data 3 (IO_GFP)
	OFF	OFF	OFF	ON	ON	ON
	54.9			69.1
	56.5			60.2
	61.1			54.4
	61			61.4
	52.1			59.5
	56.2			59.5
	57			57.4
	62.1			55.6
	58.7			47.2
	50.1			50.1
	56.2			49.5
