# Supplementary material for: Acquisition phase-specific contribution of climbing fiber transmission to cerebellum-dependent motor memory in mice
Source: eLife. 2025 Sep 2;13:RP95838. doi: 10.7554/eLife.95838 (PMC12404610; doi:10.7554/eLife.95838)
Supplement: Figure 2—source data 4. [file elife-95838-fig2-data4.xlsx]

## Sheet: Figure 2-source data 4 (IO_NpHR
	OFF	OFF	OFF	ON	ON	ON
	63.8			54.9
	62.4			71.2
	58.8			60.6
	61.7			67.4
	56.8			52.4
	61.2			59.7
	66.6			64.4
	59.8			60.3
	59.6			60.2
	59.2			58.9
