# Supplementary material for: Acquisition phase-specific contribution of climbing fiber transmission to cerebellum-dependent motor memory in mice
Source: eLife. 2025 Sep 2;13:RP95838. doi: 10.7554/eLife.95838 (PMC12404610; doi:10.7554/eLife.95838)
Supplement: Figure 3—source data 1. [file elife-95838-fig3-data1.xlsx]

## Sheet: Figure 3-source data 1 (OKR_Lea
	Time	NpHR	NpHR	NpHR	NpHR	NpHR	NpHR	NpHR	NpHR	NpHR
		185	186	187	193	194	195	1005	1006	1007
0 min		0.341	0.323	0.361	0.419	0.474	0.323	0.394	0.255	0.468
10 min		0.304	0.465	0.345	0.613	0.668	0.371	0.457	0.251	0.392
20 min		0.172	0.563	0.366	0.655	0.706	0.442	0.547	0.268	0.365
30 min		0.148	0.588	0.328	0.632	0.735	0.49	0.427	0.351	0.291
40 min		0.186	0.552	0.391	0.669	0.742	0.537	0.452	0.198	0.509
50 min		0.121	0.606	0.394	0.568	0.767	0.511	0.518	0.257	0.492
+24hr		0.272	0.524	0.383	0.523	0.648	0.473	0.483	0.284	0.293
