# Supplementary material for: Acquisition phase-specific contribution of climbing fiber transmission to cerebellum-dependent motor memory in mice
Source: eLife. 2025 Sep 2;13:RP95838. doi: 10.7554/eLife.95838 (PMC12404610; doi:10.7554/eLife.95838)
Supplement: Figure 3—source data 2. [file elife-95838-fig3-data2.xlsx]

## Sheet: Figure 3-source data 2 (OKR_Lea
	Time	GFP	GFP	GFP	GFP	GFP	GFP	GFP	GFP
		191	192	181	182	1009	1010	1011	1012
0 min		0.285	0.299	0.465	0.414	0.473	0.294	0.337	0.293
10 min		0.489	0.497	0.639	0.612	0.549	0.493	0.446	0.336
20 min		0.677	0.673	0.656	0.718	0.684	0.618	0.521	0.381
30 min		0.724	0.746	0.718	0.718	0.647	0.675	0.519	0.547
40 min		0.75	0.801	0.773	0.8	0.725	0.673	0.545	0.601
50 min		0.802	0.845	0.813	0.819	0.7	0.745	0.571	0.686
+24hr		0.876	0.815	0.816	0.846	0.7	0.752	0.637	0.727
