# Supplementary material for: Acquisition phase-specific contribution of climbing fiber transmission to cerebellum-dependent motor memory in mice
Source: eLife. 2025 Sep 2;13:RP95838. doi: 10.7554/eLife.95838 (PMC12404610; doi:10.7554/eLife.95838)
Supplement: Figure 3—source data 3. [file elife-95838-fig3-data3.xlsx]

## Sheet: Figure 3-source data 3 (Change 
GFP	NpHR
181.404	35.5609
182.609	61.8143
74.8387	58.2043
97.8261	-64.5161
47.9915	60.4905
69.4362	9.14127
134.13	31.4721
153.401	0.784314
	5.12821
