# Supplementary material for: Acquisition phase-specific contribution of climbing fiber transmission to cerebellum-dependent motor memory in mice
Source: eLife. 2025 Sep 2;13:RP95838. doi: 10.7554/eLife.95838 (PMC12404610; doi:10.7554/eLife.95838)
Supplement: Figure 3—source data 4. [file elife-95838-fig3-data4.xlsx]

## Sheet: Figure 3-source data 4 (Pre vs 
	0 min	0 min	0 min	0 min	0 min	0 min	0 min	0 min	0 min	50 min	50 min	50 min	50 min	50 min	50 min	50 min	50 min	50 min
GFP	0.285	0.299	0.465	0.414	0.473	0.294	0.337	0.293		0.802	0.845	0.813	0.819	0.7	0.745	0.571	0.686
NpHR	0.341	0.323	0.361	0.419	0.474	0.323	0.394	0.255	0.468	0.121	0.606	0.394	0.568	0.767	0.511	0.518	0.257	0.492
