# Supplementary material for: Acquisition phase-specific contribution of climbing fiber transmission to cerebellum-dependent motor memory in mice
Source: eLife. 2025 Sep 2;13:RP95838. doi: 10.7554/eLife.95838 (PMC12404610; doi:10.7554/eLife.95838)
Supplement: Figure 4—source data 1. [file elife-95838-fig4-data1.xlsx]

## Sheet: Figure 4-source data 1 (OKR_Lea
	Time	NpHR	NpHR	NpHR	NpHR	NpHR	NpHR	NpHR	NpHR	NpHR
		240	241	330	331	332	334	1000	1001	1002
0 min		0.284	0.361	0.265	0.296	0.208	0.176	0.308	0.285	0.283
10 min		0.36	0.431	0.341	0.314	0.25	0.318	0.468	0.413	0.407
20 min		0.486	0.519	0.476	0.394	0.312	0.388	0.565	0.56	0.52
30 min		0.604	0.546	0.577	0.489	0.407	0.492	0.622	0.589	0.671
40 min		0.616	0.619	0.569	0.557	0.515	0.527	0.665	0.649	0.723
50 min		0.702	0.666	0.614	0.643	0.541	0.628	0.723	0.682	0.781
+24hr		0.623	0.583	0.679	0.716	0.505	0.609	0.731	0.69	0.811
