# Supplementary material for: Acquisition phase-specific contribution of climbing fiber transmission to cerebellum-dependent motor memory in mice
Source: eLife. 2025 Sep 2;13:RP95838. doi: 10.7554/eLife.95838 (PMC12404610; doi:10.7554/eLife.95838)
Supplement: Figure 4—source data 2. [file elife-95838-fig4-data2.xlsx]

## Sheet: Figure 4-source data 2 (OKR_Lea
	Time	GFP	GFP	GFP	GFP	GFP	GFP	GFP
		243	335	336	337	338	886	885
0 min		0.522	0.268	0.285	0.292	0.38	0.374	0.347
10 min		0.613	0.308	0.282	0.44	0.521	0.399	0.46
20 min		0.679	0.437	0.414	0.386	0.61	0.517	0.569
30 min		0.712	0.571	0.457	0.495	0.688	0.616	0.657
40 min		0.732	0.653	0.583	0.543	0.692	0.683	0.73
50 min		0.761	0.676	0.624	0.645	0.726	0.717	0.772
+24hr		0.752	0.693	0.613	0.751	0.741	0.736	0.797
