# Supplementary material for: Acquisition phase-specific contribution of climbing fiber transmission to cerebellum-dependent motor memory in mice
Source: eLife. 2025 Sep 2;13:RP95838. doi: 10.7554/eLife.95838 (PMC12404610; doi:10.7554/eLife.95838)
Supplement: Figure 4—source data 3. [file elife-95838-fig4-data3.xlsx]

## Sheet: Figure 4-source data 3 (Consoli
GFP	NpHR
96.2343	81.1005
104.167	72.7869
96.7552	118.625
130.028	121.037
104.335	89.1892
105.539	95.7965
105.882	101.928
	102.015
	106.024
