# Supplementary material for: Acquisition phase-specific contribution of climbing fiber transmission to cerebellum-dependent motor memory in mice
Source: eLife. 2025 Sep 2;13:RP95838. doi: 10.7554/eLife.95838 (PMC12404610; doi:10.7554/eLife.95838)
Supplement: Figure 4—source data 4. [file elife-95838-fig4-data4.xlsx]

## Sheet: Figure 4-source data 4 (OKR_Lea
	Time	NpHR	NpHR	NpHR	NpHR	NpHR	NpHR	NpHR	NpHR	NpHR
		1025	1027	894	897	1033	1035
0 min		0.24	0.162	0.381	0.371	0.176	0.189
10 min		0.202	0.229	0.56	0.535	0.339	0.368
20 min		0.4	0.271	0.732	0.709	0.453	0.538
30 min		0.406	0.375	0.788	0.859	0.572	0.624
40 min		0.633	0.378	0.77	0.932	0.672	0.635
50 min		0.653	0.387	0.824	0.885	0.735	0.69
+24 hr		0.704	0.42	0.83	0.876	0.672	0.699
