# Supplementary material for: Acquisition phase-specific contribution of climbing fiber transmission to cerebellum-dependent motor memory in mice
Source: eLife. 2025 Sep 2;13:RP95838. doi: 10.7554/eLife.95838 (PMC12404610; doi:10.7554/eLife.95838)
Supplement: Figure 4—source data 6. [file elife-95838-fig4-data6.xlsx]

## Sheet: Figure 4-source data 6 (Consoli
GFP	NpHR
97.561	88.7299
84.0361	101.796
109.069	112.349
99.5708	114.667
105.539	101.354
105.882	98.249
