# Supplementary material for: Acquisition phase-specific contribution of climbing fiber transmission to cerebellum-dependent motor memory in mice
Source: eLife. 2025 Sep 2;13:RP95838. doi: 10.7554/eLife.95838 (PMC12404610; doi:10.7554/eLife.95838)
Supplement: Figure 4—source data 7. [file elife-95838-fig4-data7.xlsx]

## Sheet: Figure 4-source data 7 (Retriev
Before	During
0.716	0.71
0.609	0.638
0.679	0.685
0.505	0.522
0.702	0.586
0.666	0.605
0.731	0.745
0.69	0.695
0.811	0.729
