# Supplementary material for: Acquisition phase-specific contribution of climbing fiber transmission to cerebellum-dependent motor memory in mice
Source: eLife. 2025 Sep 2;13:RP95838. doi: 10.7554/eLife.95838 (PMC12404610; doi:10.7554/eLife.95838)
Supplement: Figure 4—source data 8. [file elife-95838-fig4-data8.xlsx]

## Sheet: Figure 4-source data 8 (Retriev
Before	During
0.693	0.695
0.613	0.622
0.751	0.745
0.741	0.729
0.752	0.769
0.736	0.71
0.797	0.638
